# Supplementary material
Source: publisher figshare collection journal article supplement (https://gsajournals.figshare.com/ndownloader/files/17710730)
Supplement: Supplementary file 1 [file 17710730]

**TABLE S6**

**Fertility phenotypes of (B6.*Fmr1nb*- x PWD) F1 and (B6.DX.1s.*Fmr1nb*- x PWD)F1 male hybrids**

*Significantly different from wild type, P < 0.001, t -test; N.D. not determined;
